# Supplementary material for: Controlled synthesis of monodisperse silver nanoparticles supported layered double hydroxide catalyst
Source: Royal Society of Chemistry journal article supplement (doi:10.1039/c4ra14286a), 2015-01-01
Supplement: c4ra14286a1.pdf [file c4ra14286a1.pdf]

1 **Controlled synthesis of monodisperse silver nanoparticles supported**  
2 **layered double hydroxides catalyst**

3 *D. A. Islam. D. Borah and H. Acharya\**

4

5 Centre for Soft Matters, Department of Chemistry, Assam University, Silchar-788011, India

6

7

8

**Supporting Information**

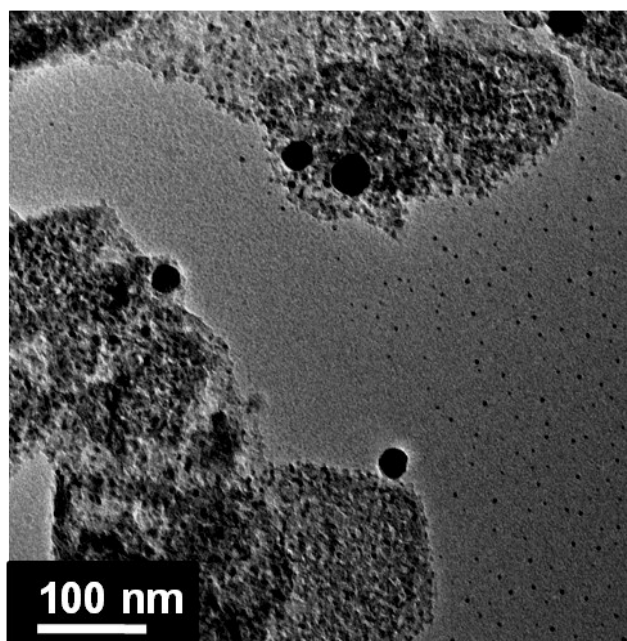

9

10

**Figure S1**

11

12 Figure S1: TEM image showing the monodisperse Ag nanoparticles deposited on LDH  
13 surface alongwith weakly bound Ag nanoparticles separated from the LDH surfaces after  
14 sonication.

15

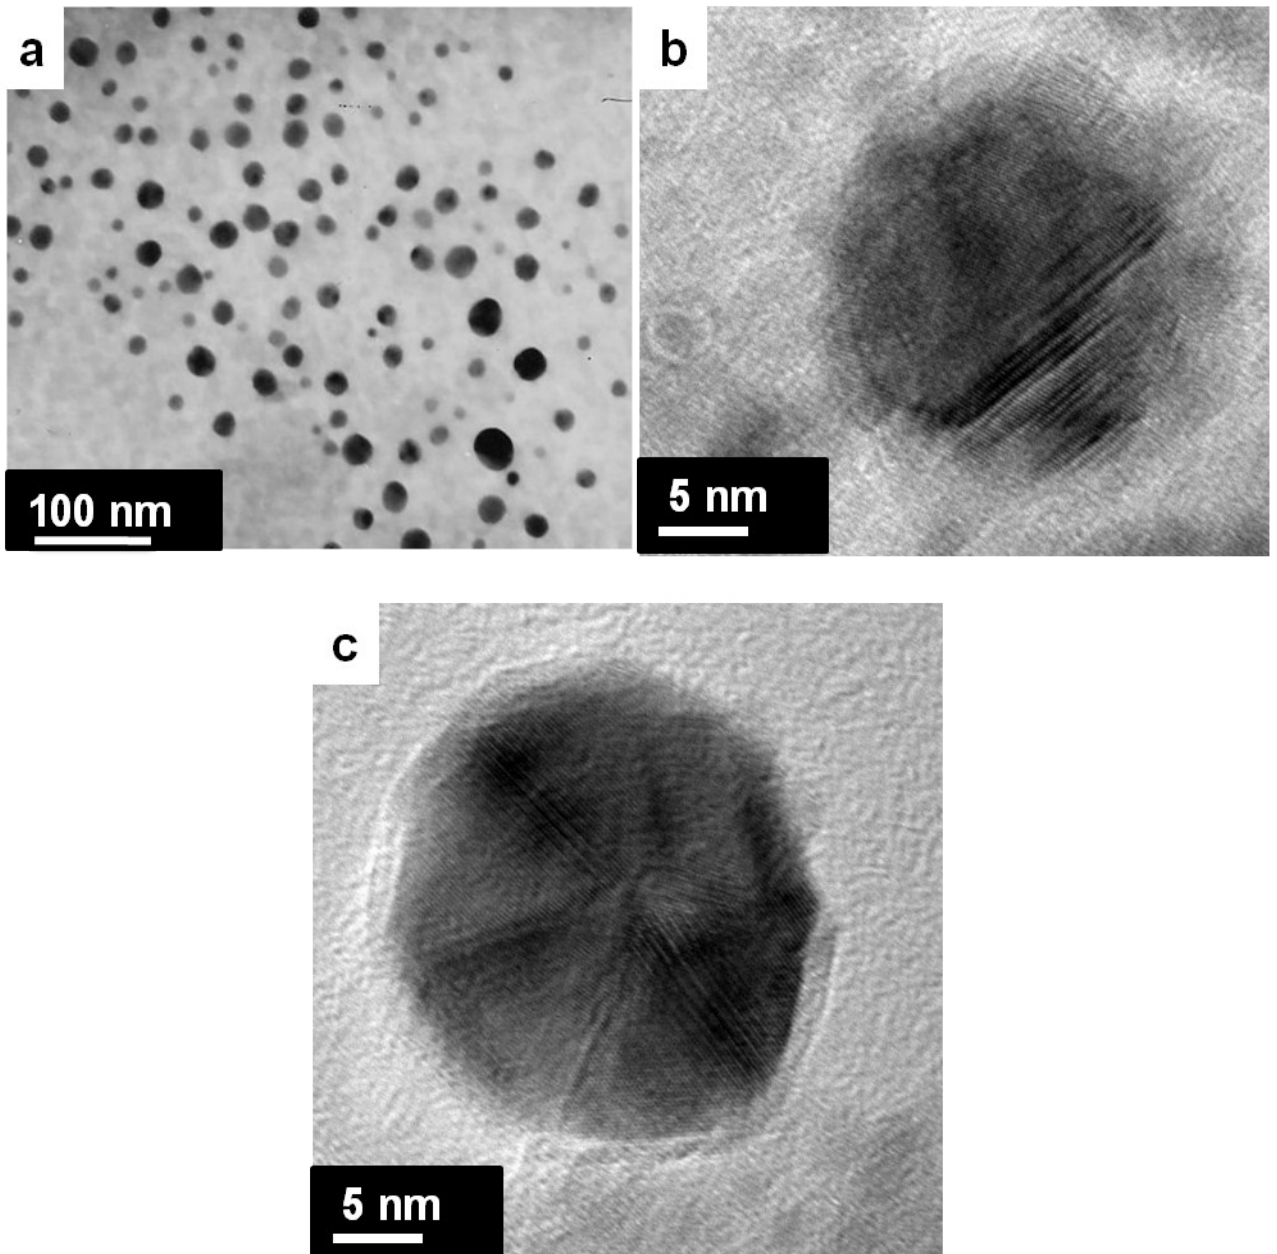

16

17

**Figure S2**

18 Figure S2. (a) TEM image of Ag nanoparticles formed in the aqueous phase during  
19 chemical reduction using ZnAl-(citrate) LDH. HRTEM images of the Ag nanoparticles  
20 separated from the LDH surface exhibit twinned growth (b) linear twin (c) multi-twin of  
21 Ag nanoparticles.

22

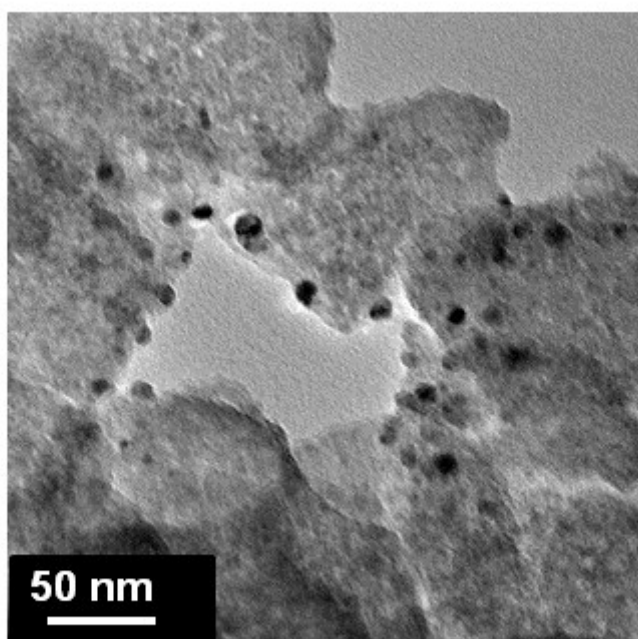

23

24

## Figure S2

25 Figure S3: TEM image showing the relatively larger Ag nanoparticles at the edges of the  
26 LDH sheets. These nanoparticles are weakly adhered to the LDHs. During sonication  
27 these nanoparticles are separated from the LDH edges.

28

29

30

31

32

33

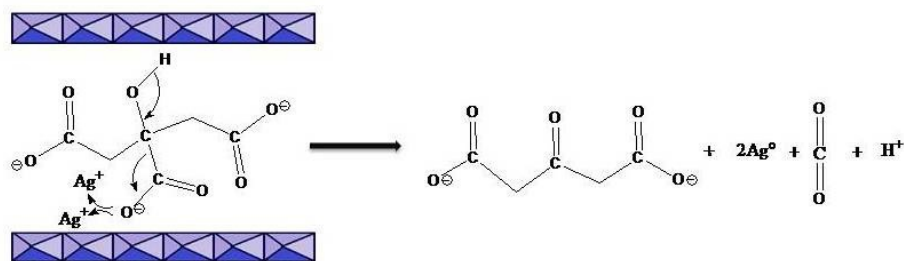

34

35

36

**Figure S4**

37 Figure S4: Probable mechanism of Ag nanoparticle formation by the reductive  
 38 decomposition of citrate anions intercalated in the interlayer of LDHs.

39
